# Supplementary material for: Differential Effect of Saturated and Unsaturated Free Fatty Acids on the Generation of Monocyte Adhesion and Chemotactic Factors by Adipocytes: Dissociation of Adipocyte Hypertrophy From Inflammation
Source: PubMed Central journal article supplement — Diabetes. 2009 Nov 23;59(2):386–96. doi: 10.2337/db09-0925 (PMC2809975; doi:10.2337/db09-0925), 2009-11-23
Supplement: supp_db09-0925_SupplementalFigureLegends.pdf [file supp_db09-0925_SupplementalFigureLegends.pdf]

## SUPPLEMENTAL FIGURE LEGENDS

### ***Supplemental FIG. 1: Induction of hypertrophy in adipocytes by excess glucose and FFAs***

3T3-L1 and human SGBS adipocytes were differentiated in 5 mM or 25 mM glucose and cultured for 7 days in the same medium with the various FFAs (250  $\mu$ M) indicated. Hypertrophy was analyzed by measuring area ( $\mu\text{m}^2$ ) of lipid droplets (A) after staining neutral lipid with HCS LipidTOX (Invitrogen) in 3T3-L1 adipocytes. Cellular lipids were extracted with chloroform: methanol, and triglyceride content (B) was measured with a colorimetric assay kit in 3T3-L1 adipocytes. Human SGBS adipocytes were also photographed (C, original magnification x400) (Control = fatty acid free albumin. \* $P < 0.001$  vs. 5 mM glucose, \*\* $P < 0.001$  vs. 25 mM glucose.

### ***Supplemental FIG. 2: DHA inhibits SFA and glucose-stimulated SAA and MCP-1 expression, and glucose-stimulated HAS2 gene expression in differentiated human SGBS and murine embryonic fibroblasts (MEFs)***

SGBS (A-D) and MEF (E-G) adipocytes were differentiated in 5 mM or 25 mM glucose and cultured for 7 days in the same medium with various FFAs (250  $\mu$ M). Total RNA was isolated and analyzed by multiplex real time RT-PCR using SAA1 (A), SAA3 (E) or MCP-1 (B, F) HAS2 (C, G) specific primers and probes, and normalized to GAPDH. Conditioned media were analyzed by immunoblot using an anti-human SAA1 antibody (D). \* $P < 0.001$  vs. 5 mM glucose control, \*\* $P < 0.001$  vs. 25 mM glucose control.

### ***Supplemental FIG. 3: Palmitate, stearate and DHA do not increase apoptosis of differentiated 3T3-L1 adipocytes.***

Differentiated 3T3-L1 adipocytes were exposed to the indicated concentrations of glucose (left) or 250  $\mu$ M of palmitate, stearate and DHA (top) for 7 days with daily media changes. At the end of 7 days, the cells were detached with trypsin and subjected to FACS analysis. The horizontal axis represents annexin V staining, a measure of apoptosis. The vertical axis is propidium iodide staining, a measure of cell necrosis. The upper right panel shows cells exposed to  $\text{H}_2\text{O}_2$  (100  $\mu$ M), which was used as a positive control, indicated by detecting annexin V positive cell in the lower right hand quadrant.

### ***Supplemental FIG. 4: Adiponectin expression is increased by arachidonate, EPA and DHA.***

3T3-L1 adipocytes were differentiated in 5 mM or 25 mM glucose and cultured for 7 days in the same medium with various FFAs (250  $\mu$ M). Total RNA was isolated and analyzed by multiplex real time RT-PCR using adiponectin specific primers and probes, and normalized to GAPDH. \* $P < 0.001$  vs. 5 mM glucose control.

### ***Supplemental FIG. 5: Antioxidants prevent excess glucose and palmitate from stimulating NF $\kappa$ B, and increasing the production of SAA3, MCP-1 and HA in 3T3-L1 adipocytes.***

3T3-L1 adipocytes differentiated in 5 mM or 25 mM glucose were cultured in the same media with or without 250  $\mu$ M of palmitate for 7 days. Some adipocytes were also replenished with the antioxidants, NAC (10 mM), catalase (100 units/ml) or SOD (100 units/ml). Adipocytes were fixed and stained using an anti-p65 NF $\kappa$ B antibody, followed by the addition of a FITC-secondary antibody (A, original magnification x400). Total RNA was collected for analysis of SAA3 and MCP-1 mRNA expression by real time RT-PCR using SAA3 and MCP-1 specific primers and probes, and normalized to GAPDH (B and C). Conditioned media from adipocytes were analyzed by immunoblot using a SAA3 antibody (D) and monocyte chemotactic activity of these conditioned media were analyzed using the 96-well Boyden chemotaxis described in Fig. 3 (E). Cell lysates were also harvested for analysis of HA content by ELISA (F). \* $P$  < 0.001 vs. 25 mM glucose, \*\* $P$  < 0.001 vs. 25 mM glucose + palmitate.
