# Supplementary material for: Differential Effect of Saturated and Unsaturated Free Fatty Acids on the Generation of Monocyte Adhesion and Chemotactic Factors by Adipocytes: Dissociation of Adipocyte Hypertrophy From Inflammation
Source: PubMed Central journal article supplement — Diabetes. 2009 Nov 23;59(2):386–96. doi: 10.2337/db09-0925 (PMC2809975; doi:10.2337/db09-0925), 2009-11-23
Supplement: supp_db09-0925_SupplFigs2to5.pdf [file supp_db09-0925_SupplFigs2to5.pdf]

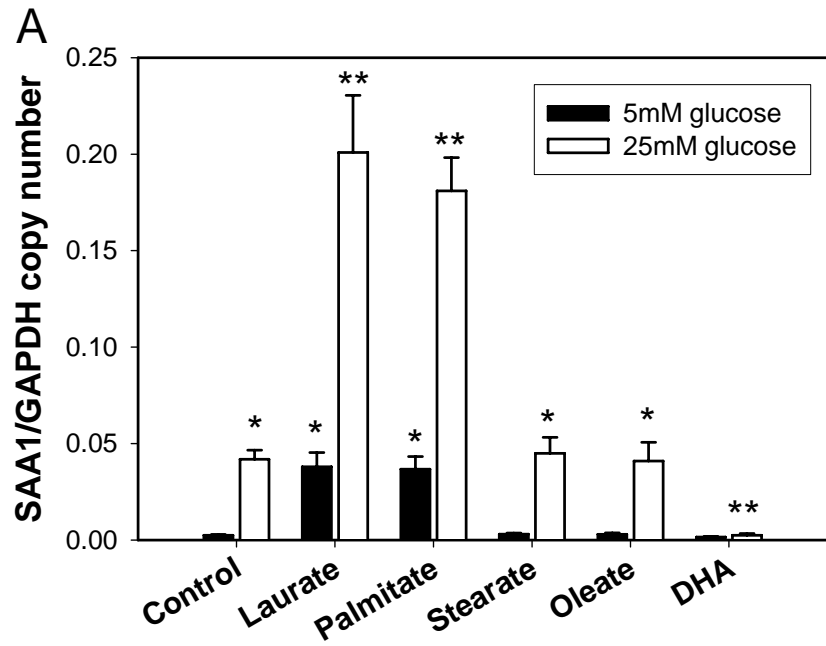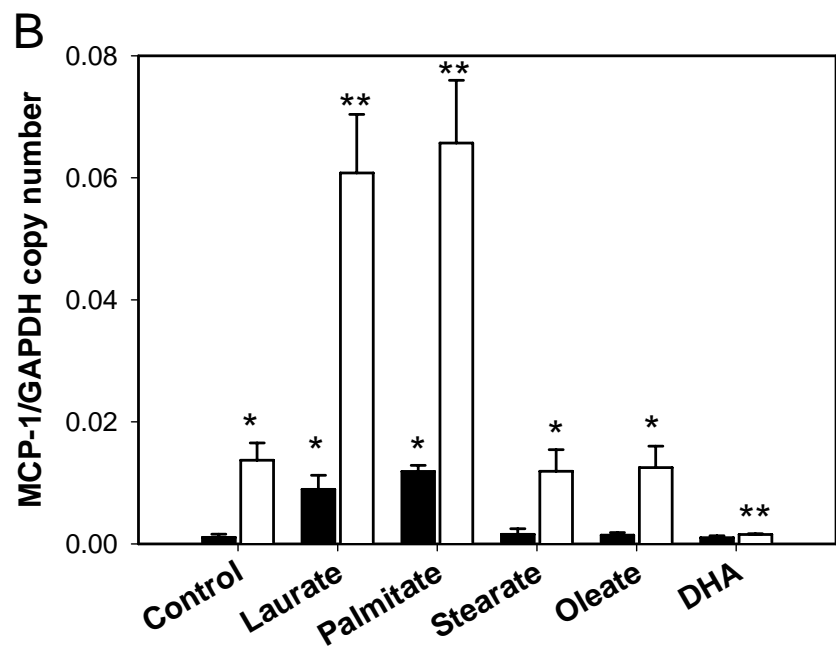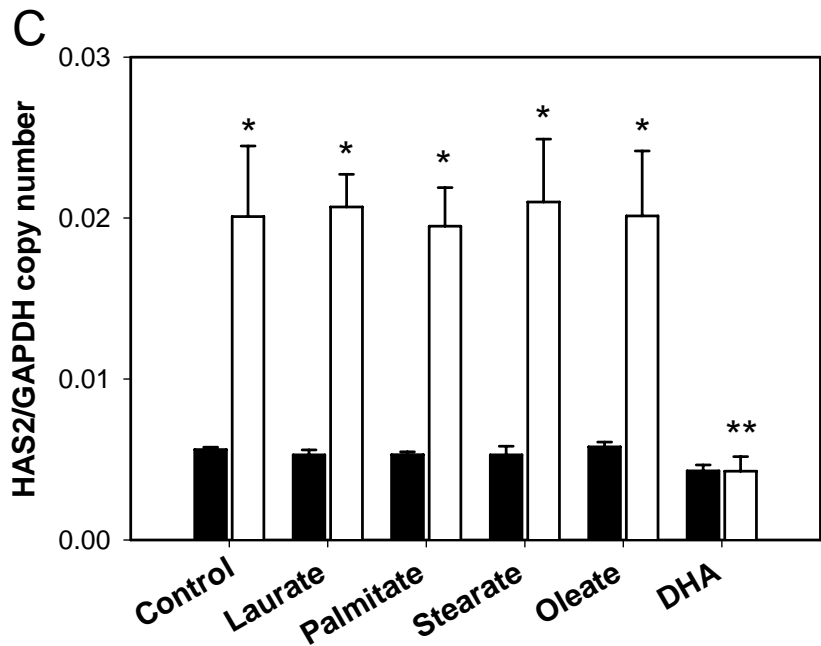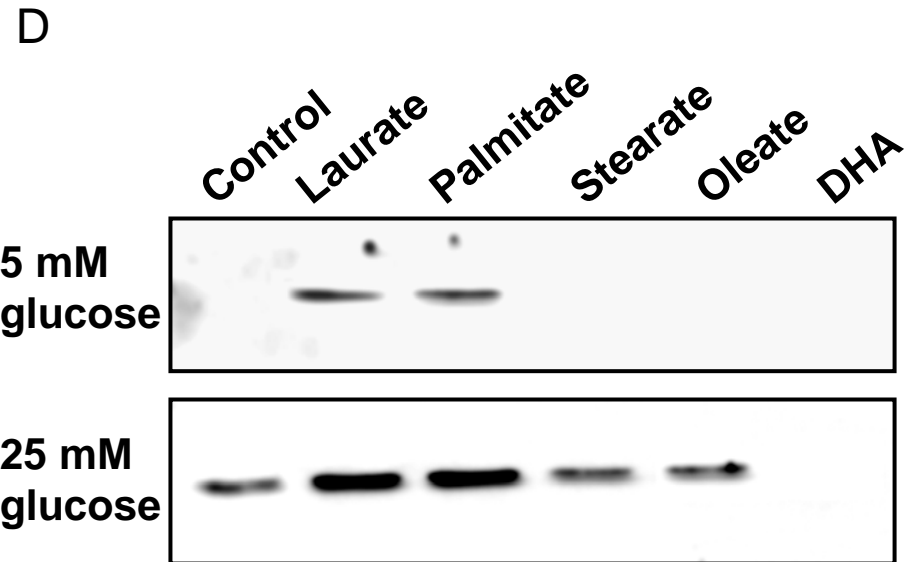

Supplemental Figure 2

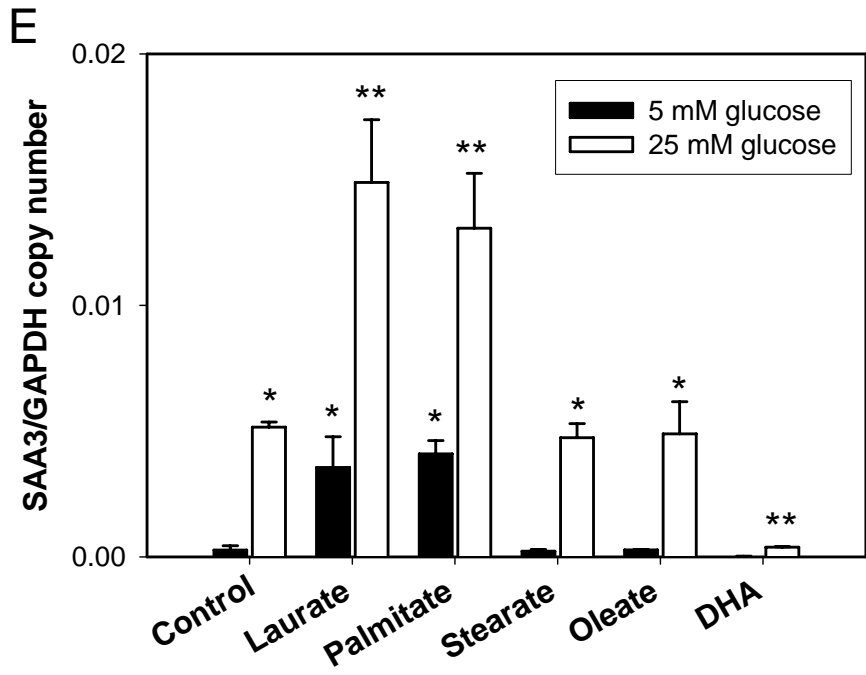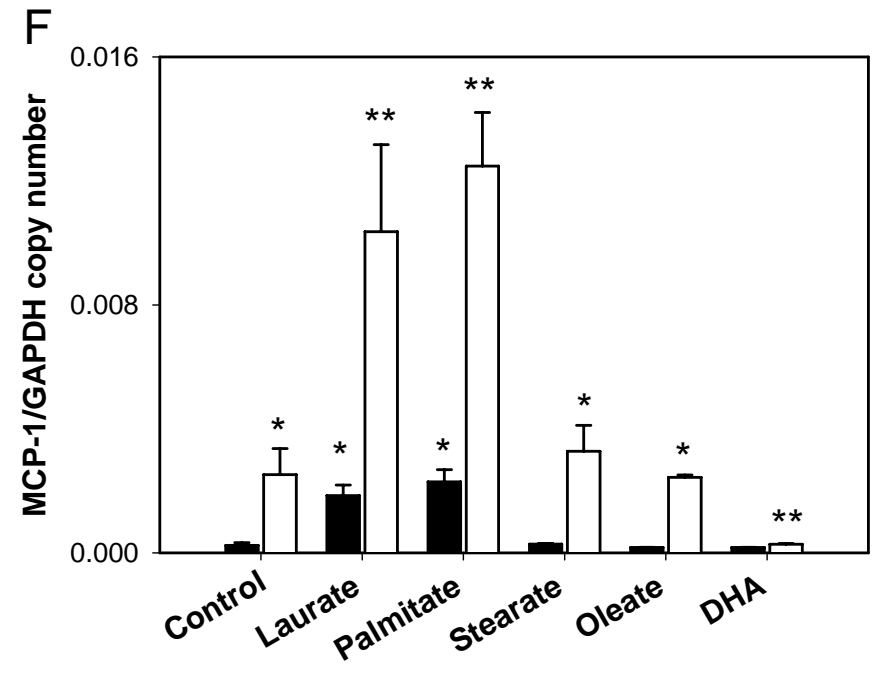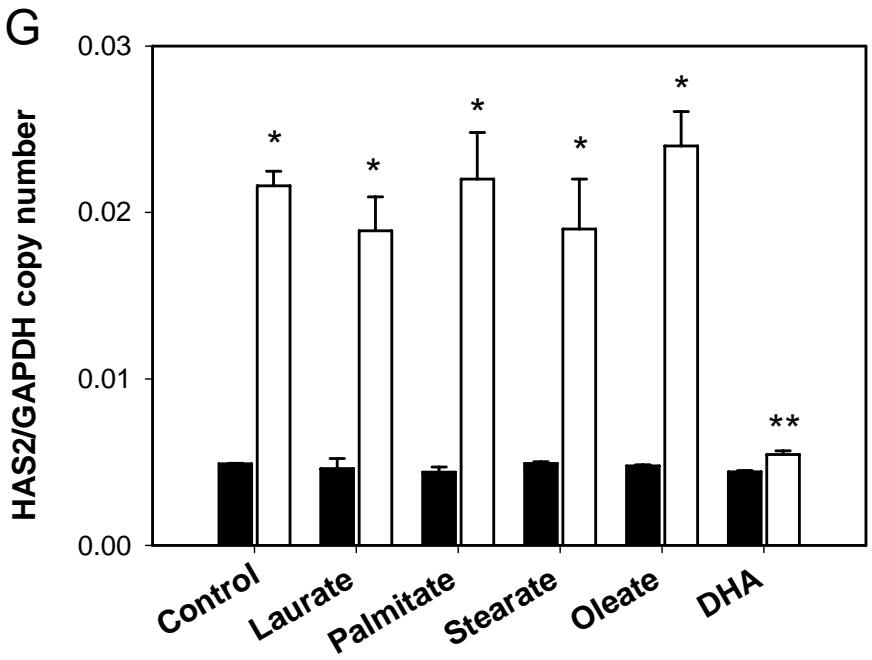

Supplemental Figure 2

# Palmitate

# H<sub>2</sub>O<sub>2</sub>

125  $\mu$ M

250  $\mu$ M

500  $\mu$ M

750  $\mu$ M

100  $\mu$ M

Low

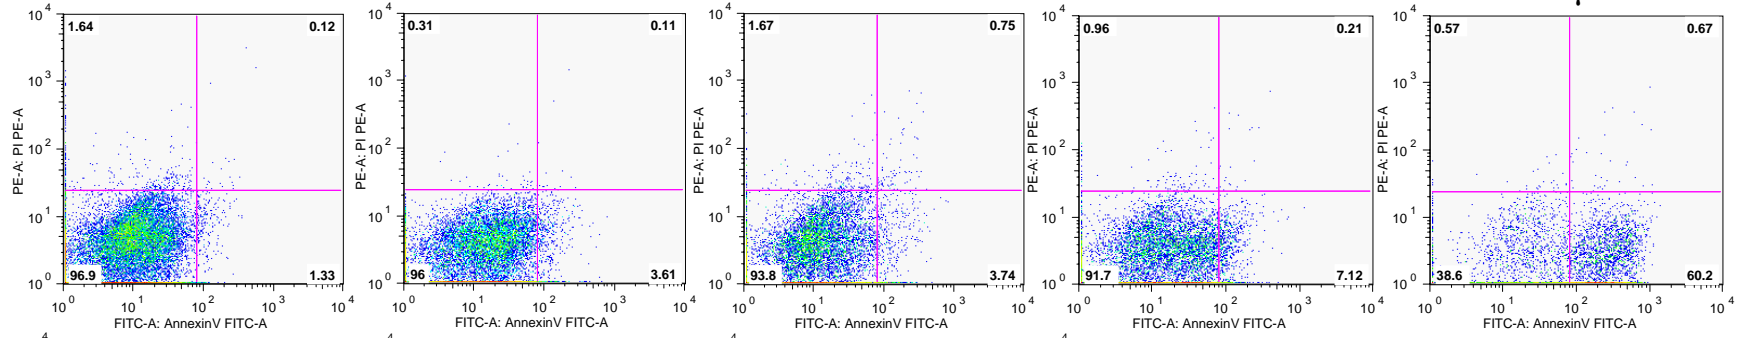

High

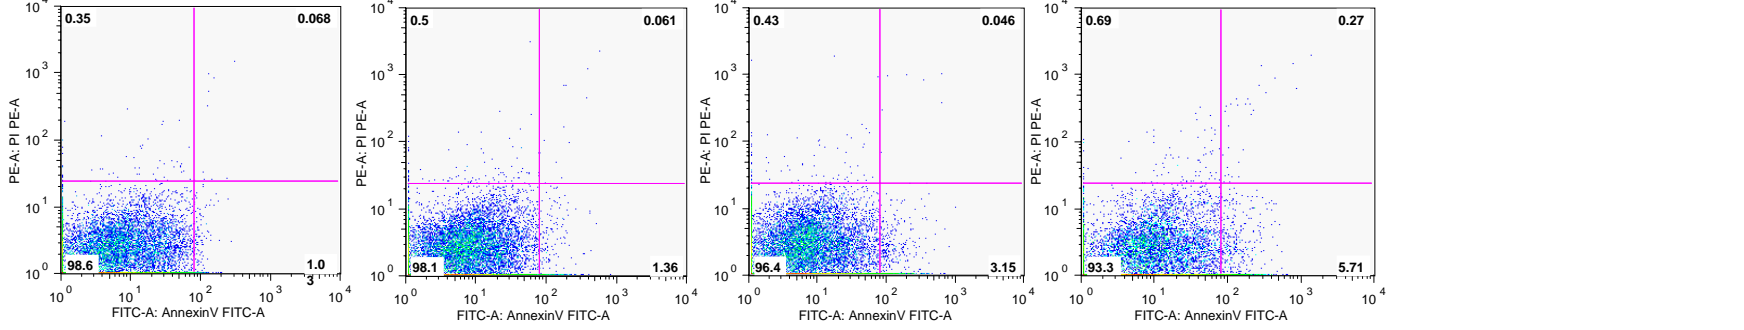

Propidium iodide

# Annexin V-FITC

Low glucose

High glucose

Palmitate+DHA

Stearate

Palmitate+DHA

Stearate

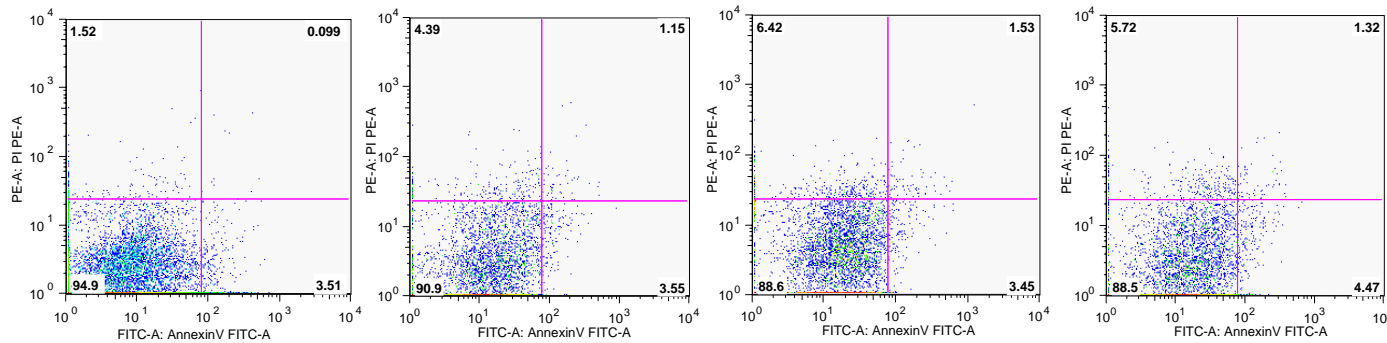

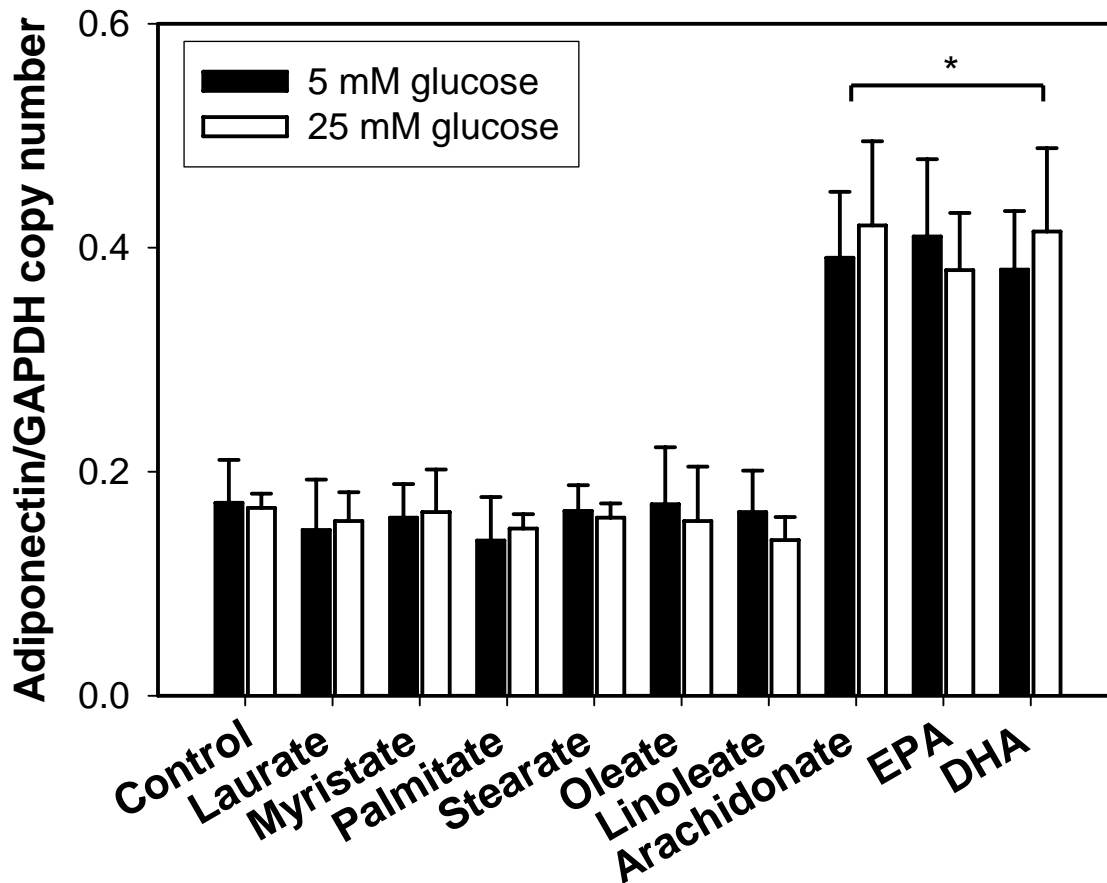

Supplemental Figure 4

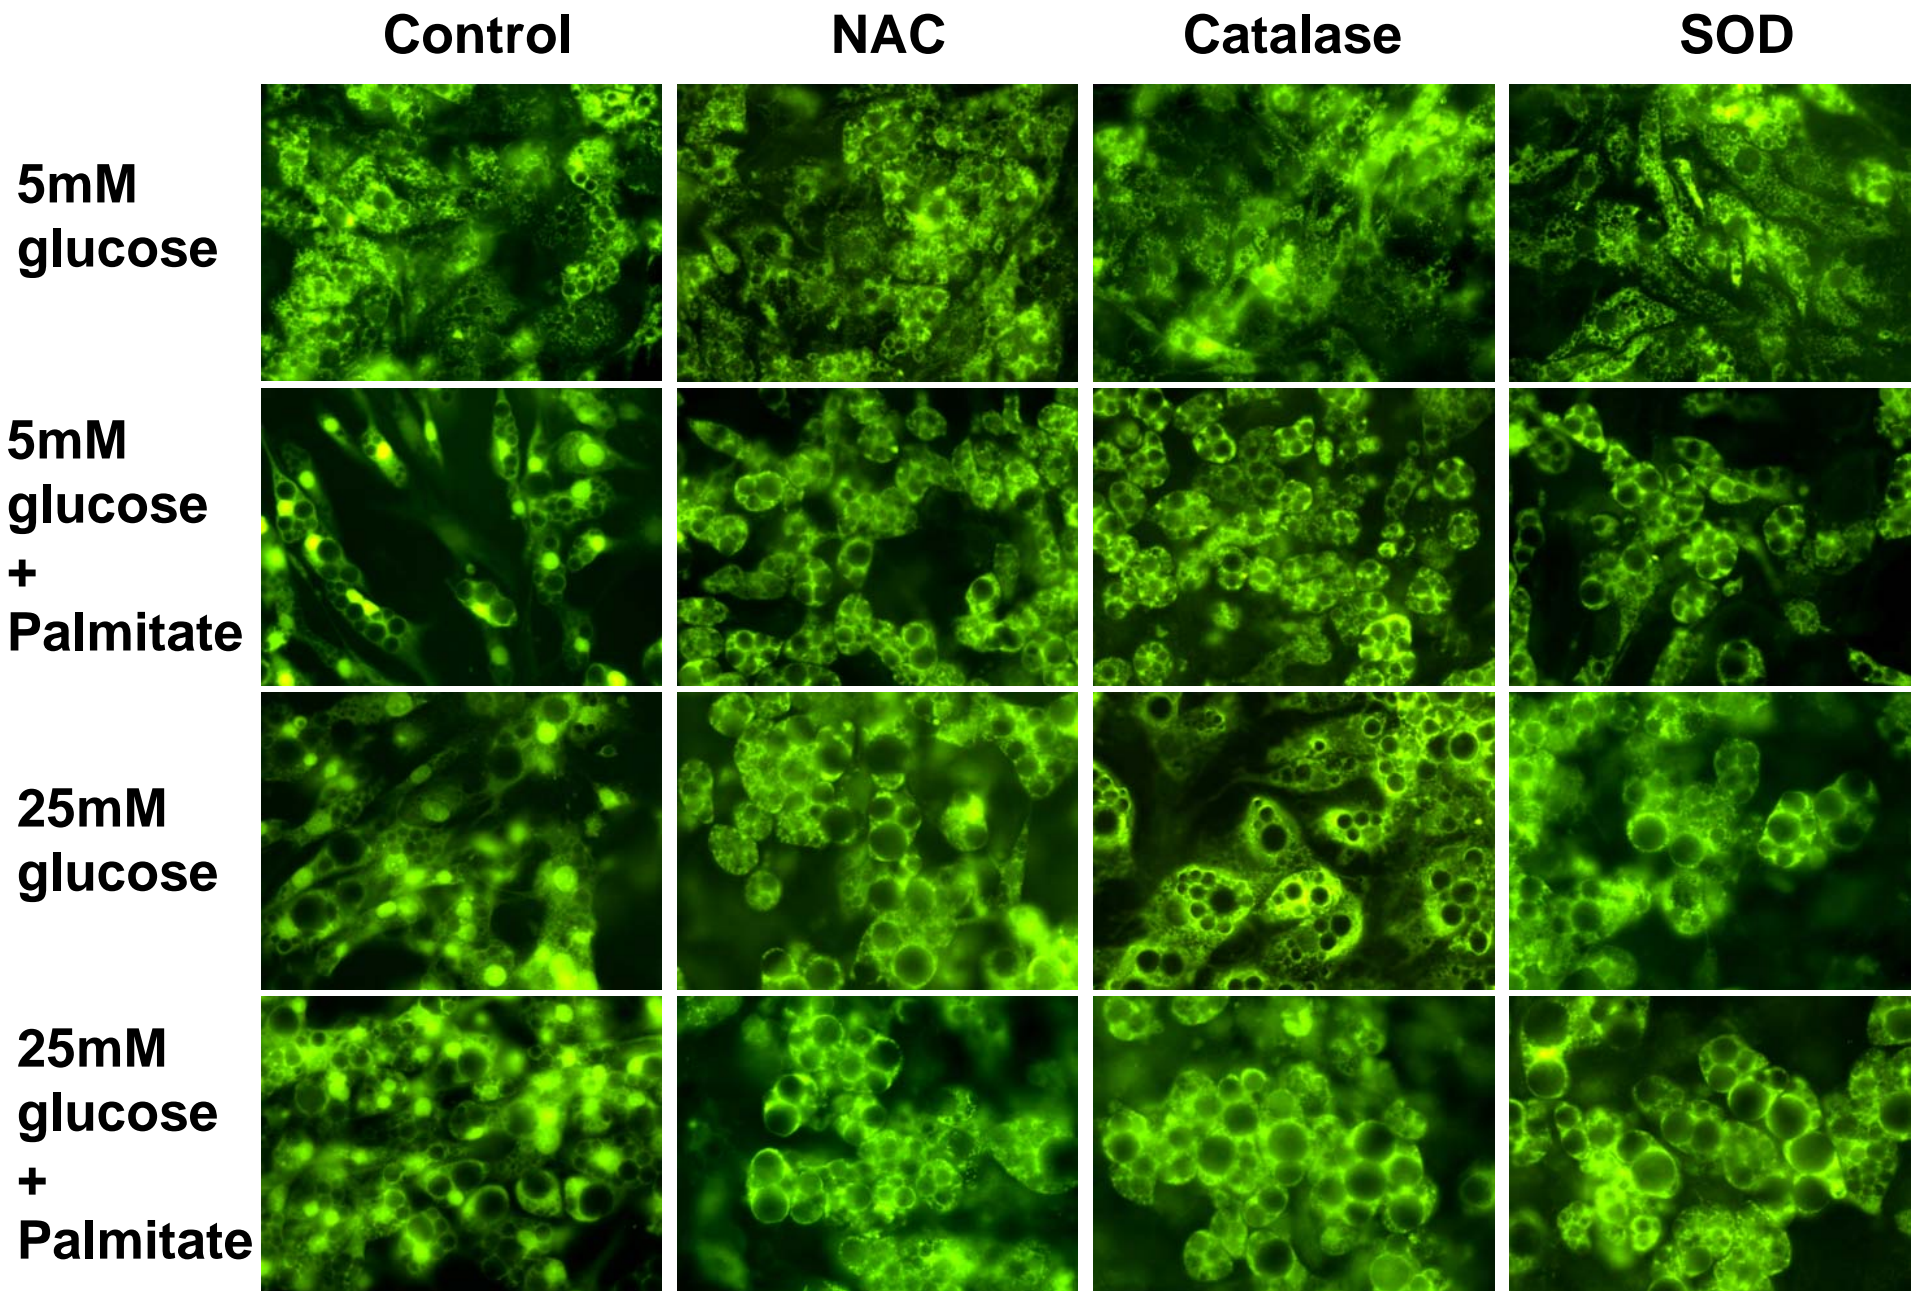

Supplemental Figure 5A

**B**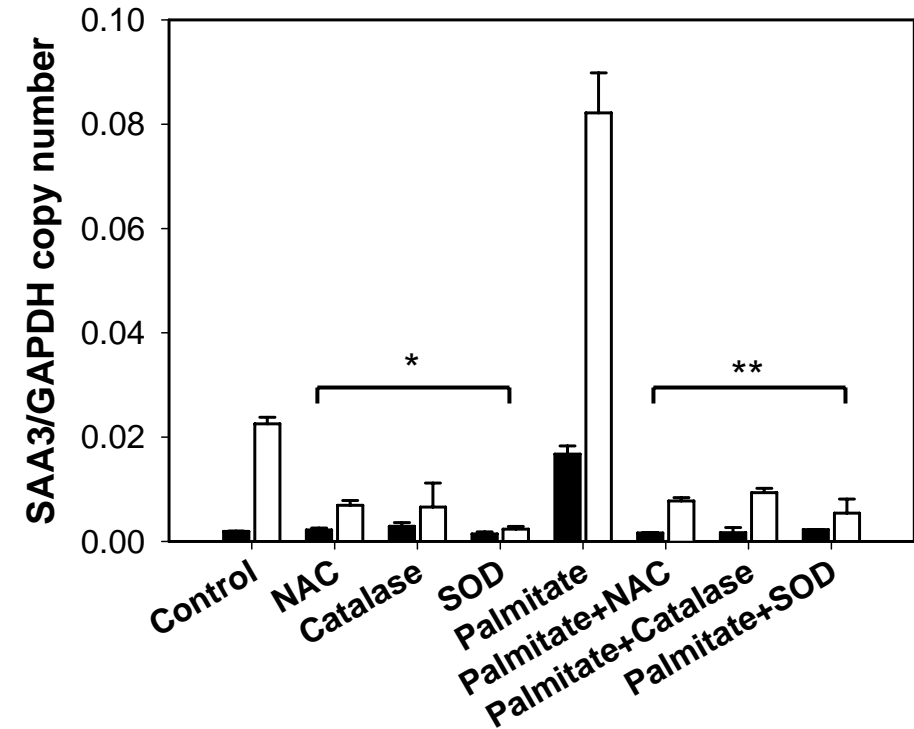**C**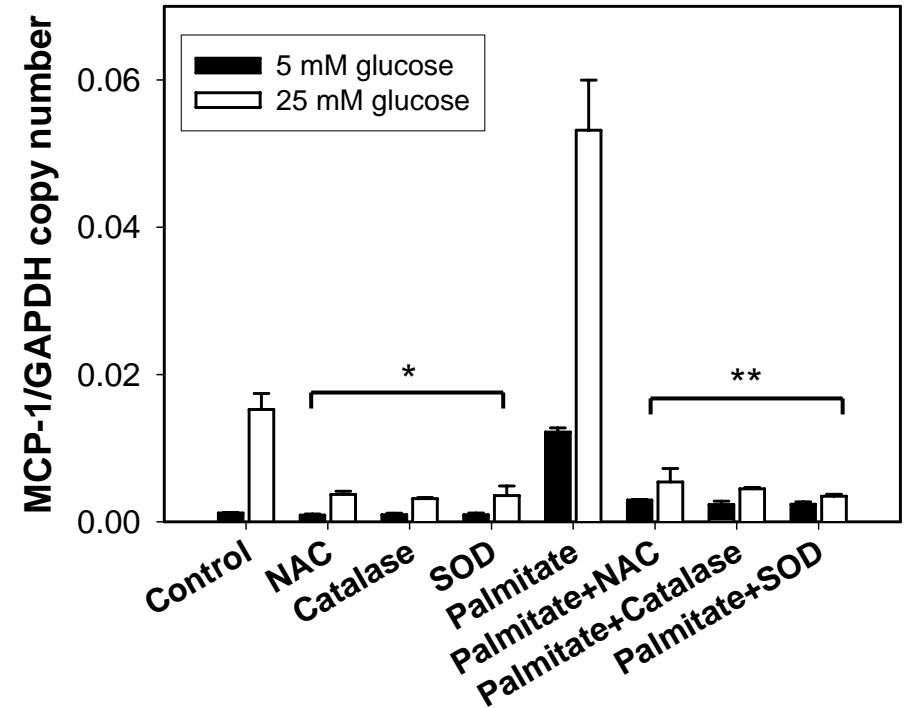

**Control**  
**NAC**  
**Catalase**  
**SOD**  
**Palmitate**  
**Palmitate + NAC**  
**Palmitate + Catalase**  
**Palmitate + SOD**

**5 mM glucose**

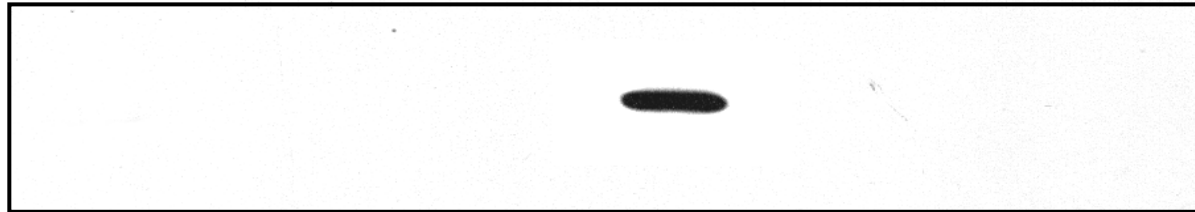

**25 mM glucose**

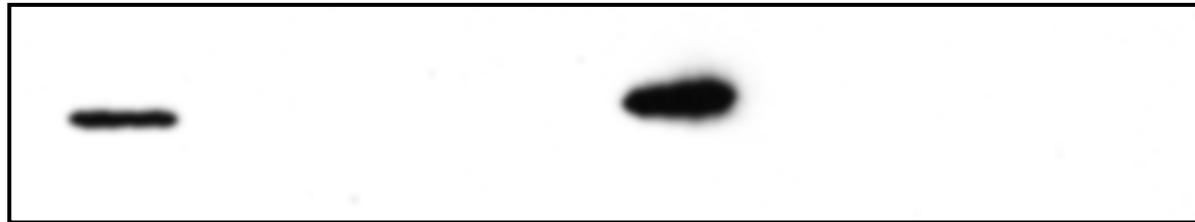

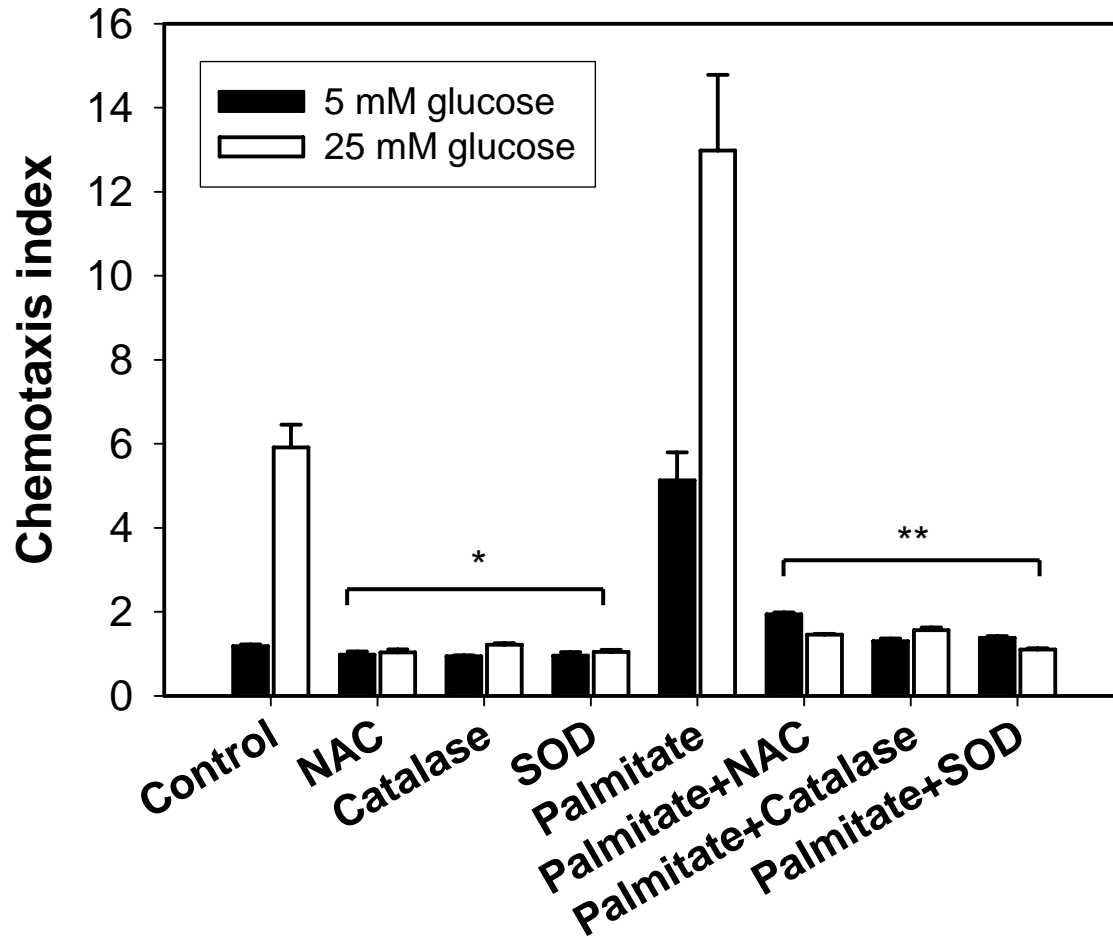



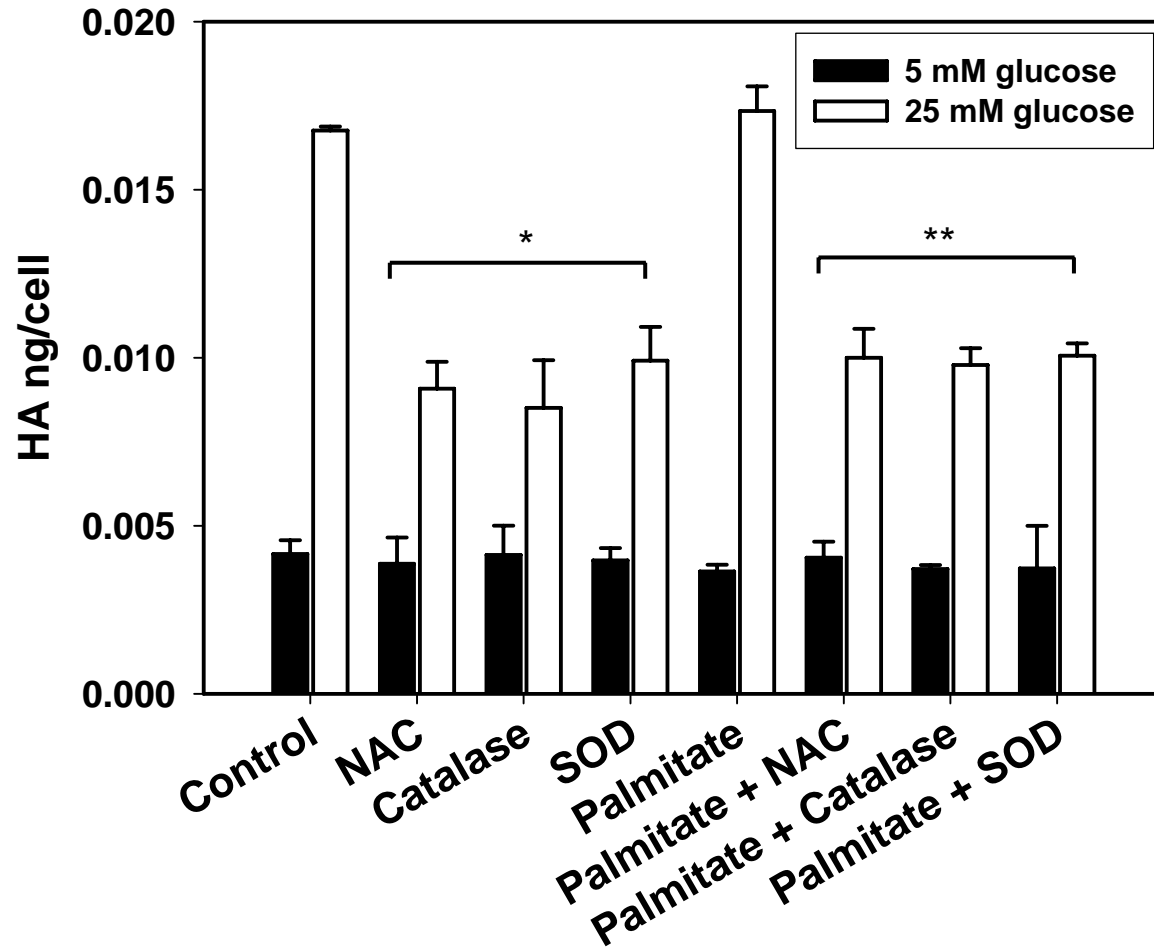

Supplemental Figure 5F
