# Supplementary figures and images for: Differential Effect of Saturated and Unsaturated Free Fatty Acids on the Generation of Monocyte Adhesion and Chemotactic Factors by Adipocytes: Dissociation of Adipocyte Hypertrophy From Inflammation
Source: PubMed Central journal article supplement — Diabetes. 2009 Nov 23;59(2):386–96. doi: 10.2337/db09-0925 (PMC2809975; doi:10.2337/db09-0925), 2009-11-23

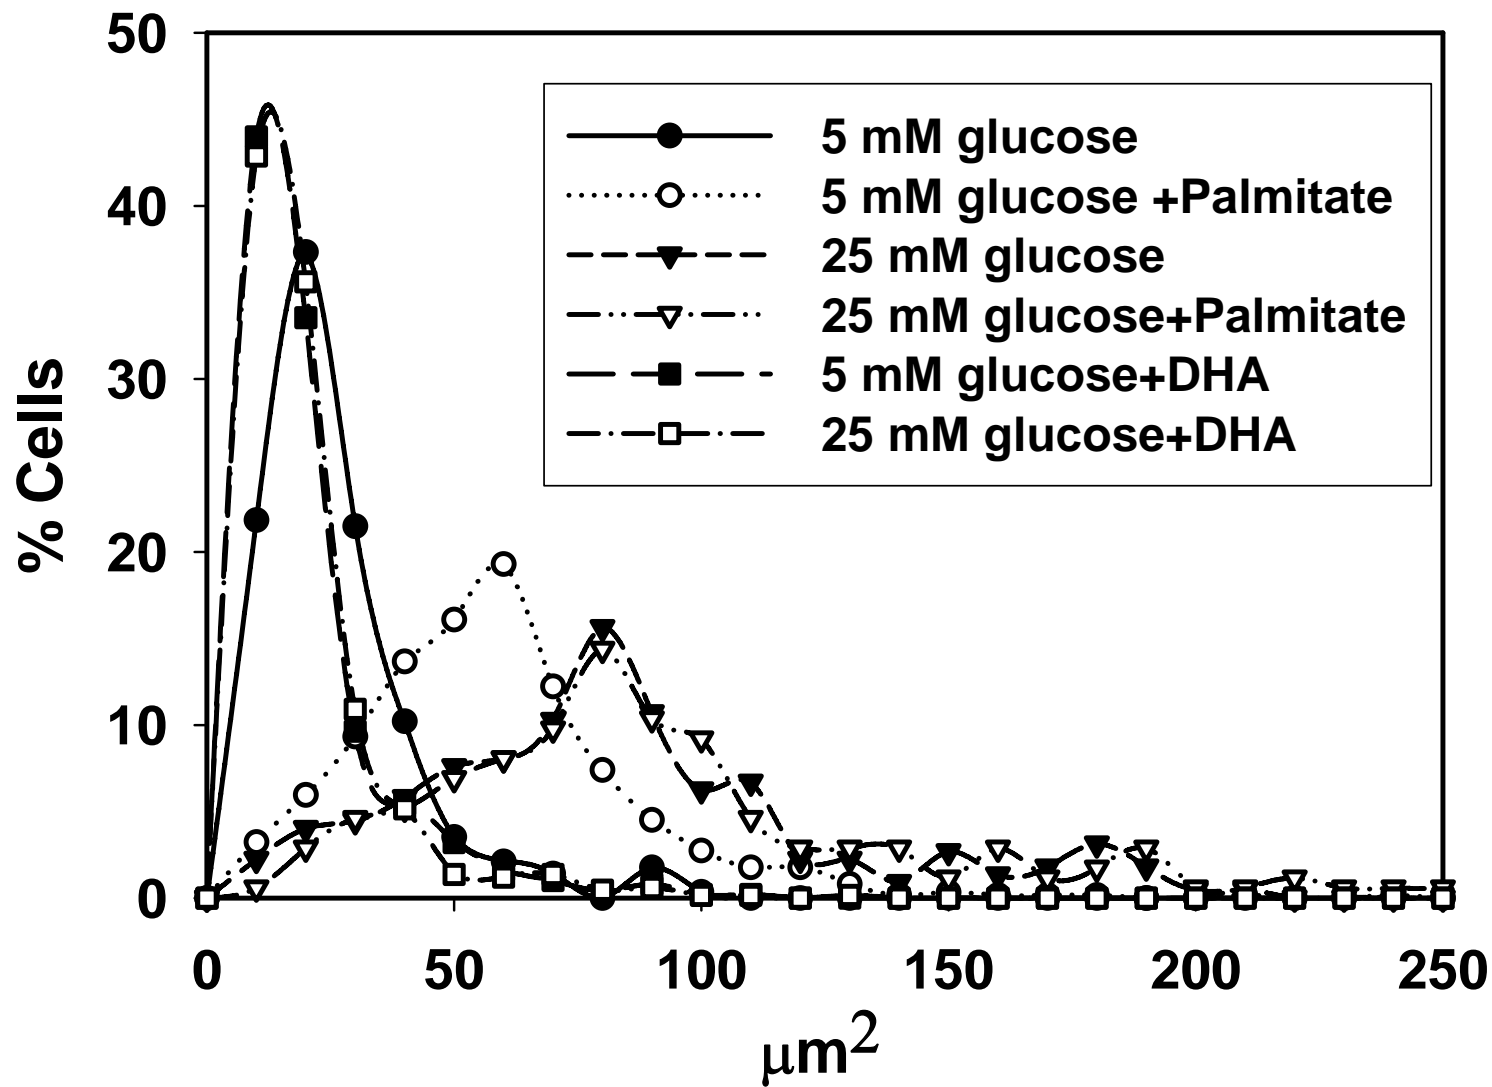

Supplemental Figure 1A

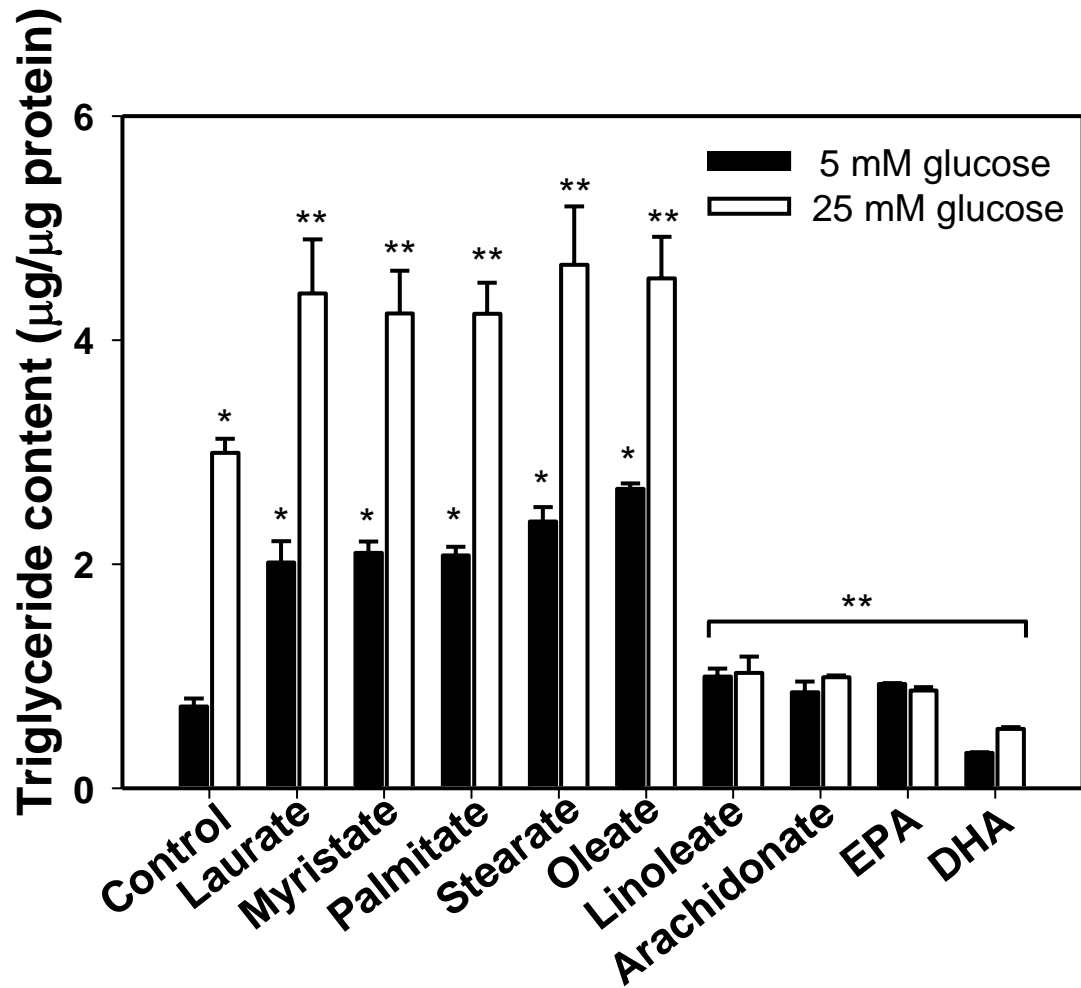

Supplemental Figure 1B

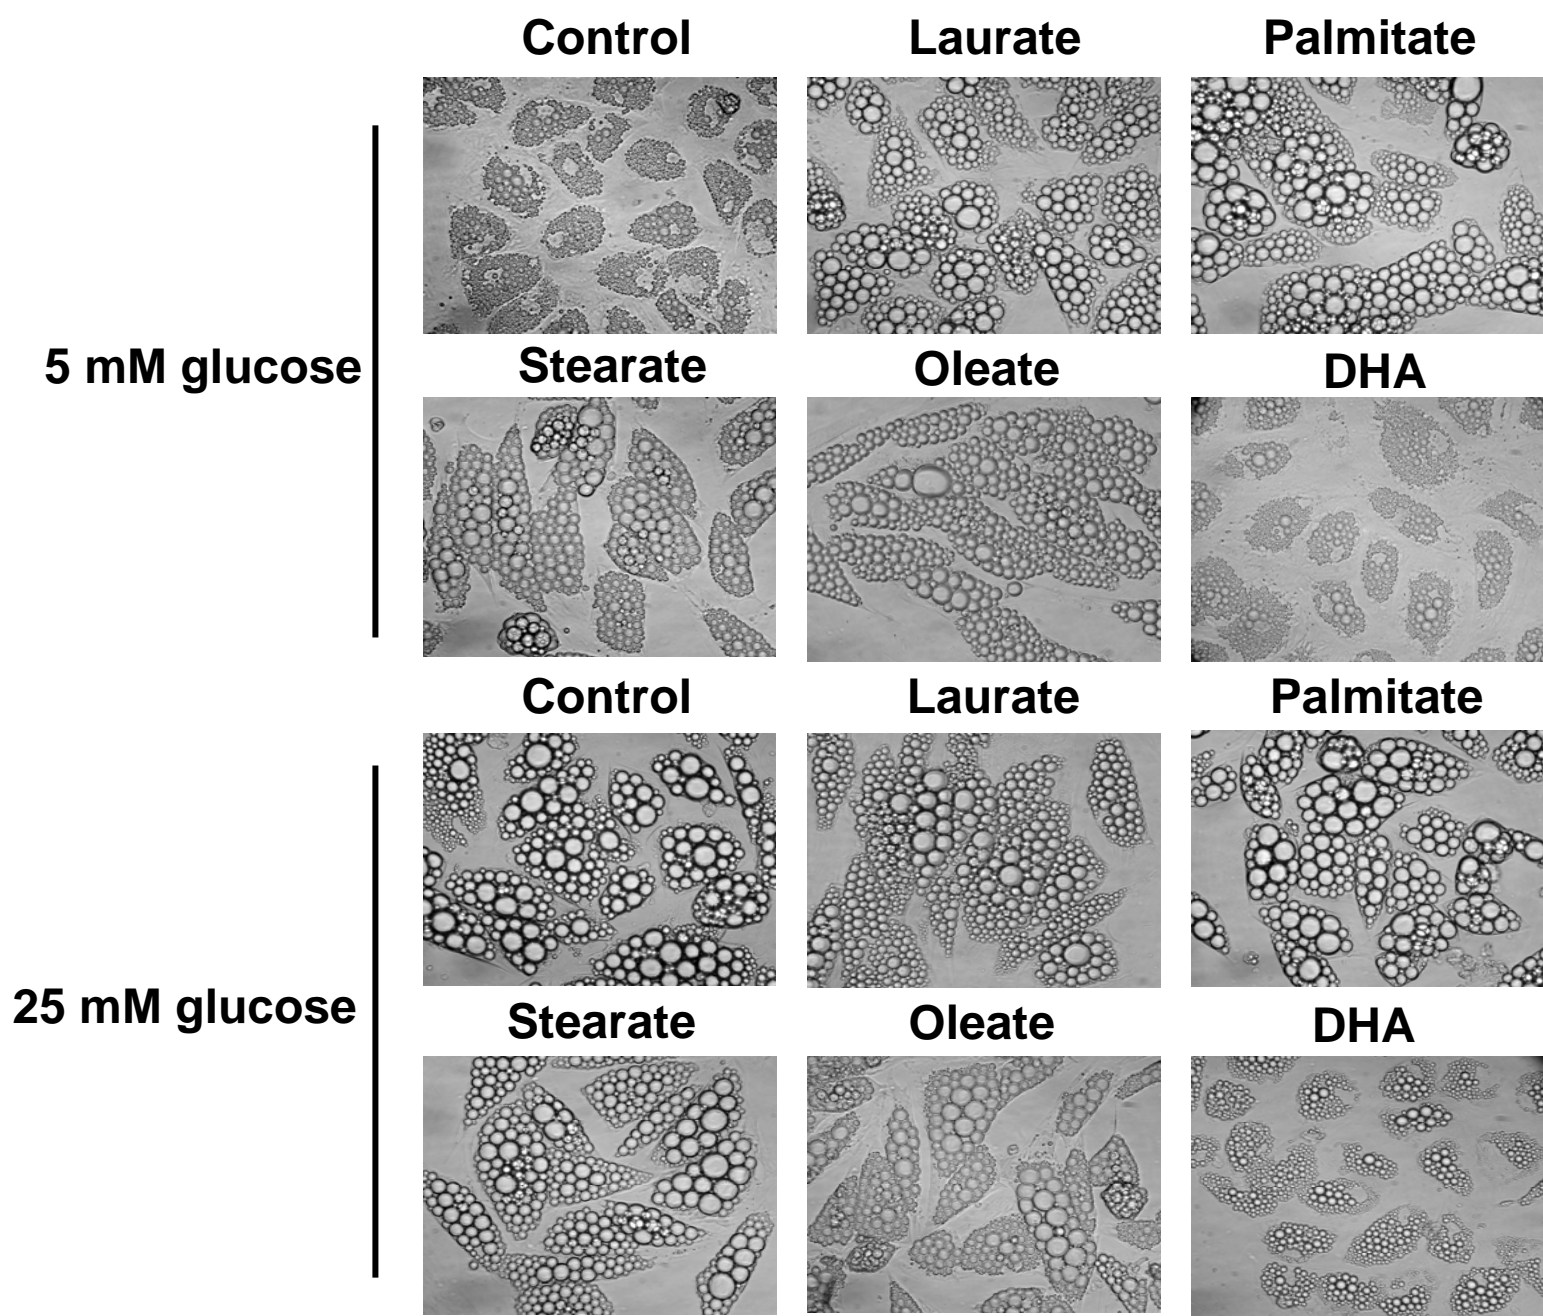

Supplemental Figure 1C

Supplement: supp_db09-0925_SupplFig1.pdf [file supp_db09-0925_SupplFig1.pdf]
